# Supplementary material for: Exacerbation of AMD Phenotype in Lasered CNV Murine Model by Dysbiotic Oral Pathogens
Source: MDPI journal article supplement (doi:10.3390/antiox10020309), 2021-02-18
Supplement: s1 [file s1]

# Exacerbation of AMD phenotype in Lasered CNV Murine Model by Dysbiotic Oral Pathogens

Pachiappan Arjunan<sup>1,4\*</sup>, Radhika Swaminathan<sup>1</sup>, Jessie Yuan<sup>1</sup>, Mohamed Elashiry<sup>1</sup>, Amany Tawfik<sup>2,4</sup>, Mohamed Al-Shabrawey<sup>2,4</sup>, Pamela M Martin<sup>3,4</sup>, Thangaraju Muthusamy<sup>3</sup>, and Christopher W. Cutler<sup>1</sup>

<sup>1</sup>Department of Periodontics, Dental College of Georgia, Augusta, GA 30912, USA; [parjunan@augusta.edu](mailto:parjunan@augusta.edu); [rswaminathan@augusta.edu](mailto:rswaminathan@augusta.edu); [jeyuan@augusta.edu](mailto:jeyuan@augusta.edu); [moelashiry@augusta.edu](mailto:moelashiry@augusta.edu); [chcutler@augusta.edu](mailto:chcutler@augusta.edu)

<sup>2</sup>Department of Oral Biology and Diagnostic Sciences, Augusta, GA 30912, USA; [amtawfik@augusta.edu](mailto:amtawfik@augusta.edu); [malshabrawey@augusta.edu](mailto:malshabrawey@augusta.edu)

<sup>3</sup>Department of Biochemistry & Molecular Biology, Augusta, GA 30912, USA; [pmmartin@augusta.edu](mailto:pmmartin@augusta.edu); [mthangaraju@augusta.edu](mailto:mthangaraju@augusta.edu)

<sup>4</sup>Vision Discovery Institute, Augusta University, Augusta, GA 30912, USA.

\* Corresponding author: [PARJUNAN@augusta.edu](mailto:PARJUNAN@augusta.edu)

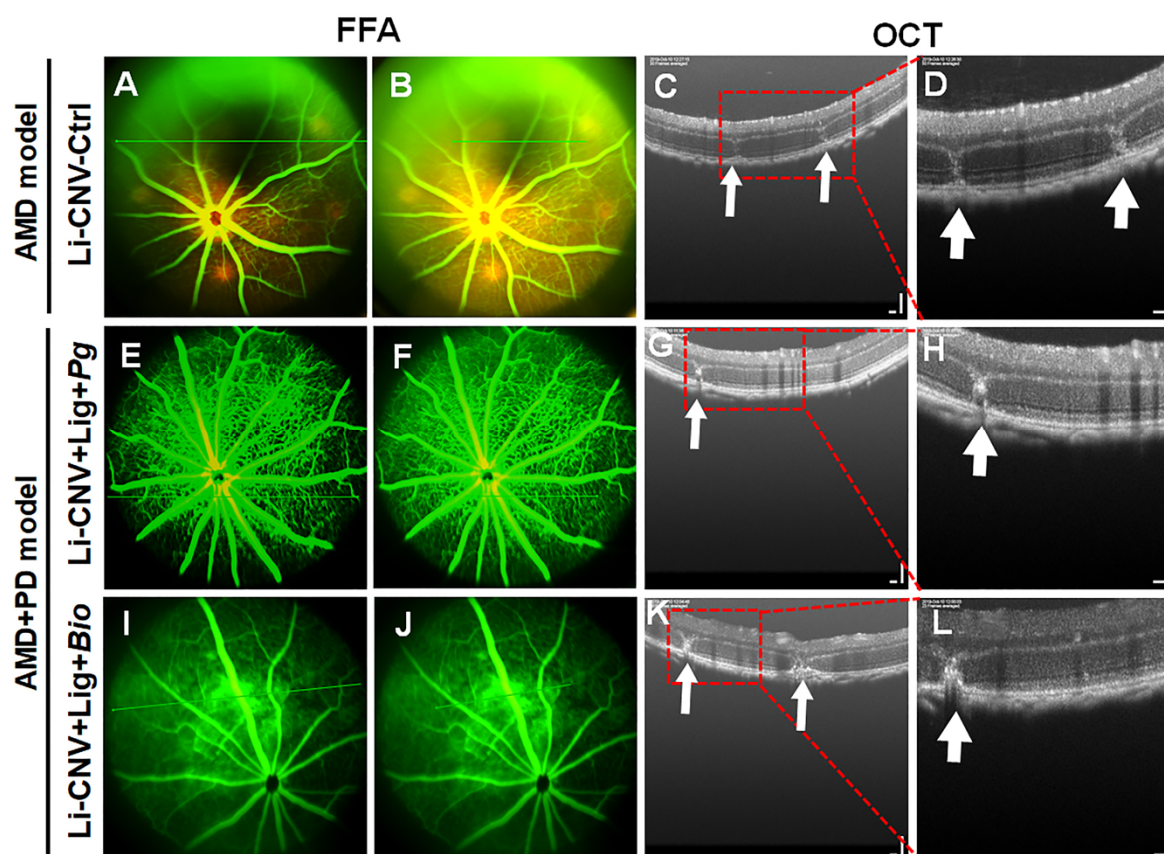

**S. Figure 1. Oral pathogens augmented vascular leakage in AMD+PD mice retina.**

**A)** After laser induction, mice were ligated with *Pg* or biofilm infection, AMD+PD murine model established as described in the methods. Fundus fluorescence Angiography (FFA) show vascular leakage in Li-CNV control (**A, B** with laser burn spots), Li-CNV+Ligature+*Pg* (**E, F**; shows more fibrovascular formation), and Li-CNV+Lig+Biofilm (**I, J**) after a week of laser and ligature induction; n=18. Spectral domain optical coherence tomography (SD-OCT) after 1 week of Li-CNV-Control (**C, D**), Li-CNV+Lig+*Pg* (**G, H**) and Li-CNV+Lig+Biofilm (**K, L**) infected mice retinæ. OCT shows ruptured Bruch's membrane (BM, white arrows) induced by laser treatment in Li-CNV control (**C**), Li-CNV+Lig+*Pg* (**G**) and Li-CNV+Lig+Bio (**K**). Boxed areas in **C, G** and **K** show an enlarged region as **D, H** and **L** (with laser lesion, arrows), respectively.

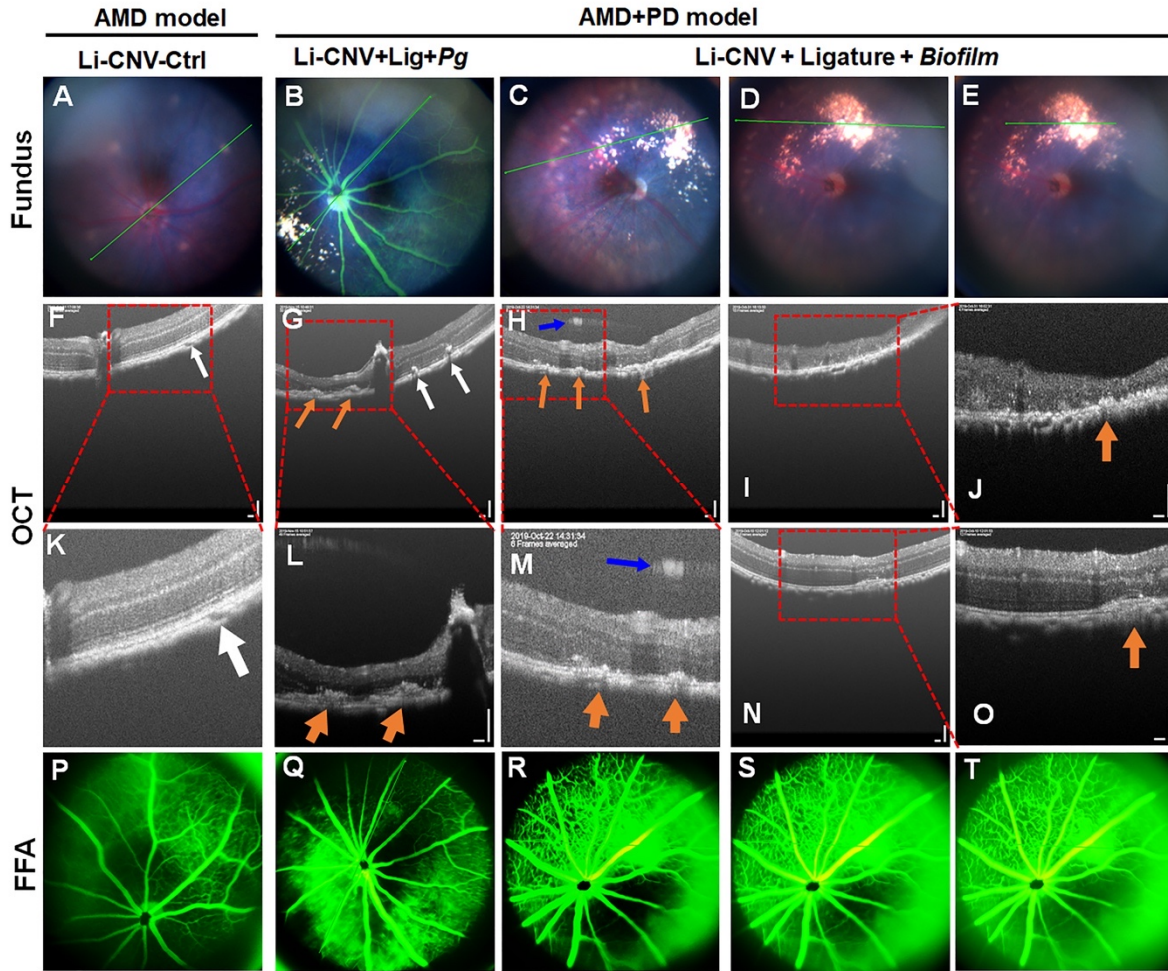

**S. Figure 2. Advancement of AMD pathogenesis in AMD+PD mice retinæ.** Representative images of fundus (A-E), SD-OCT (F-O), and FFA (P-T) after 6 weeks of Li-CNV-Ctrl (A,F,K,P), Li-CNV+Lig+Pg (B,G,L,Q) and Li-CNV+Lig+Bio (C-E, H-J, M-O, R-T) infected mice retinæ, respectively. A-E) Increased CNV lesion like morphology were observed by fundus imaging analysis in *Pg* (B) and biofilm (C-E) persistently infected retina compared with CNV-control (A). F-O) OCT images further demonstrates chronic CNV lesion (white arrows) in *Pg* (E) and Biofilm (F) after 6-weeks with vitreal (blue arrow) and subretinal angiogenesis compared to Li-CNV control (F, K). Orange arrows point out the drusenoid deposits located above the RPE layer. Boxed areas in F, G, H, I and N show an enlarged region as K, L, M, J and o, respectively. P-T) FFA displays increased blood leakage after 6 weeks compared to CNV.



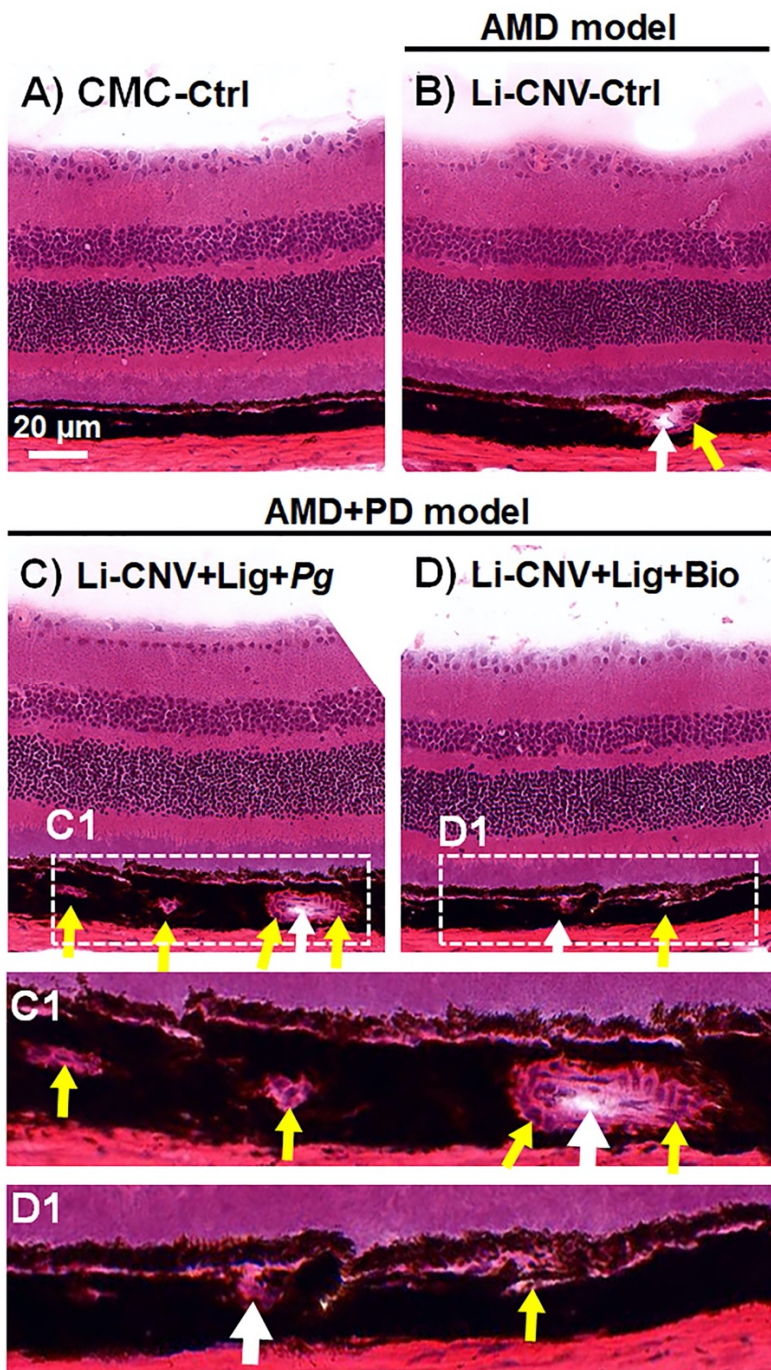

**S. Figure 3. Reduced retinal thickness and infiltration of immune cells in the CNV area and choriocapillaris of AMD+PD mice.** A-D) Representative images of hematoxylin and eosin staining illustrates thickness of retinal layers of Li-CNV+Lig+Pg and Li-CNV+Lig+Biofilm orally infected mice models after 6 weeks compared to CMC and Li-CNV controls. White arrows show the CNV areas. B-D; C1 and D1) White arrows indicate the CNV spots (empty space) while yellow arrows shows infiltration of immune cells in choriocapillaris of the AMD+PD retina. (Scale bar: 20 μm).

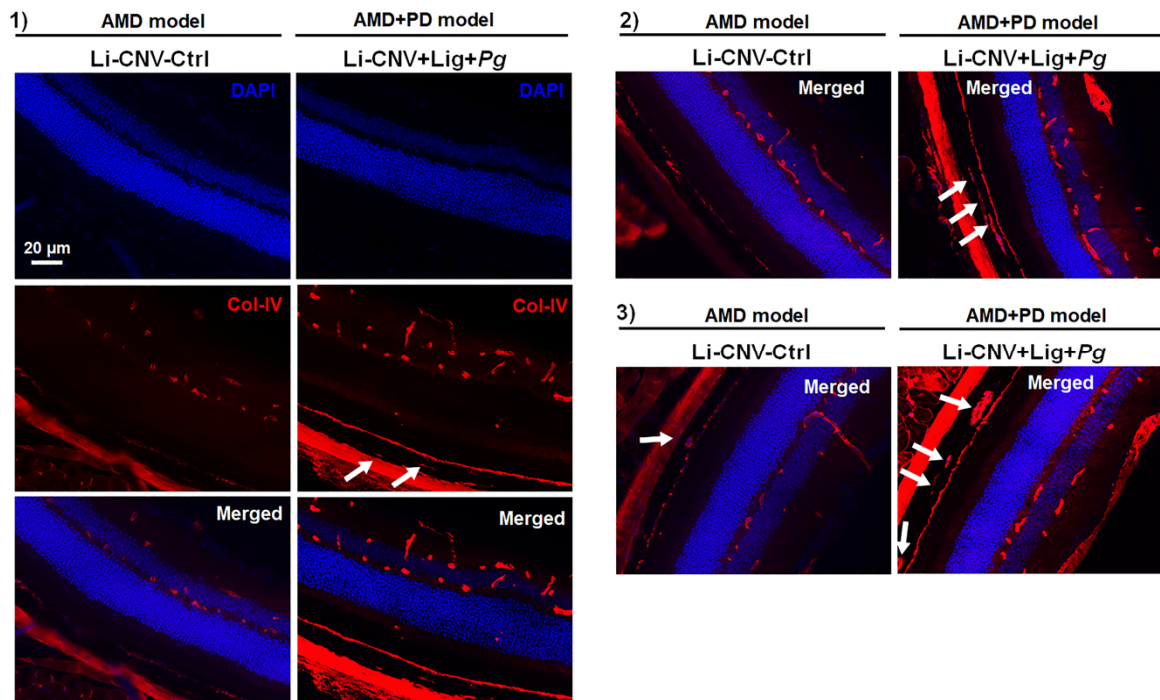

**S. Figure 4. Intensified neovasculation in the choroidal and retinal area of AMD+PD mice.** 1-3) Representative images of immunofluorescence staining shows more Col-IV positivity in the AMD+PD mice retinas and choroidal region (white arrows) compared with CNV control. (Scale bar: 20  $\mu$ m).

**Table S1. List of mouse primers for SYBR Green-qPCR analysis**

| Gene Name | Description                          | Sense Strand (FW) (5'-3') | Anti-Sense (RV) (5'-3') |
|-----------|--------------------------------------|---------------------------|-------------------------|
| Vegf-A    | Vascular endothelial growth factor A | aggctgctgtaacgatgaag      | tgtcctatgtgctggctttg    |
| Il-6      | Interleukin 6                        | cacggccttcctacttcac       | ctgcaagtgcacgttgt       |
| Il-8      | Interleukin 8                        | gggtgtactgcgtatcctg       | agacaaggacgacagcgaag    |

|       |                                              |                         |                        |
|-------|----------------------------------------------|-------------------------|------------------------|
| Gpx1  | Glutathione peroxidase 1                     | gggactacaccgagatgaacg   | ccgcaggaaggtaaagagc    |
| Sod1  | Superoxide dismutase 1                       | gtgtgctgtctgaagggcg     | cttcatttccaccttgccc    |
| Prdx1 | Peroxiredoxin 1                              | cacggagatcattgctttcag   | ggatcactgccaggtttcc    |
| Nrf2  | Nuclear factor erythroid 2-related factor 2  | cgagatatacgaggagaggaaga | gctcgacaatgttctccagctt |
| Ho-1  | Heme oxygenase 1                             | gatgacacctgaggtcaagca   | cagctcctcaaacagctcaat  |
| Gclc  | Glutamate-cysteine ligase, catalytic subunit | aacacagaccaacccagag     | ccgcatcttctggaaatgtt   |
| Gclm  | Glutamate-cysteine ligase, modifier subunit  | tcgcctccgattgaagatgg    | ttttacctgtgccactga     |
